# Supplementary material for: An argyrodite-type Ag9GaSe6 liquid-like material with ultralow thermal conductivity and high thermoelectric performance
Source: Royal Society of Chemistry journal article supplement (doi:10.1039/c7cc05935c), 2017-01-01
Supplement: c7cc05935c1.pdf [file c7cc05935c1.pdf]

## Supporting Information

### Experimental details

To synthesis the  $\text{Ag}_9\text{GaSe}_6$  compound, high purity raw elements, Ag (shots, 99.999%, Alfa Aesar), Ga (shots, 99.999%, Alfa Aesar), and Se (pieces, 99.999%, Alfa Aesar) were weighted out in stoichiometric proportions and then sealed in silica tubes under vacuum. The tubes were heated to 1373 K and held at this temperature for 12 hours before quenching into cold water. Then, the quenched ingots were annealed at 873 K for 5 days. Finally, the products were ground into fine powders and sintered by Spark Plasma Sintering (Sumitomo SPS-2040) at 813–833 K under a pressure of 40 MPa for 10 minutes. High densities ( $> 99\%$  of the theoretical density) were obtained for all samples.

### Characterization methods

The phase purity and crystal structure were examined by the powder X-ray diffraction (PXRD) with Cu  $K\alpha$  radiation at 300 K. The electrical conductivity and Seebeck coefficient were measured by using ZEM-3 (ULVAC) from 300 to 800 K. The thermal conductivity was calculated from  $\kappa = DC_p\rho$ , where the thermal diffusivity ( $D$ ) was obtained by using a laser flash method (Netzsch LFA 457), the specific heat ( $C_p$ ) was measured by differential scanning calorimetric (Netzsch DSC 404F3), and the density ( $\rho$ ) was measured by using the Archimedes method. Hall coefficient ( $R_H$ ) was measured in a Physical Property Measurement System (Quantum Design) by sweeping the magnetic field up to 3 T in both positive and negative directions. Hall carrier concentration ( $p_H$ ) and Hall mobility ( $\mu_H$ ) were estimated by  $p_H = 1/eR_H$  and  $\mu_H = \sigma R_H$ , respectively. Measurements of the transverse and longitudinal sound velocities were performed on a sample with a diameter of 10 mm and a thickness of 2 mm using an Advanced Ultrasonic Measurement System (TECLAB).

### Calculation details<sup>1-5</sup>

Average sound velocity ( $v_a$ ) is calculated from the sound velocity

$$\frac{1}{v_a} = \left[ \frac{1}{3} \left( \frac{1}{v_l^3} + \frac{2}{v_t^3} \right) \right]^{1/3}, \quad (1)$$

where  $v_l$  is the longitudinal sound velocity and  $v_t$  is the transverse sound velocity.

Young's modulus ( $E$ ) is calculated by

$$E = \frac{\rho v_t^2 (3v_l^2 - 4v_t^2)}{(v_l^2 - v_t^2)}, \quad (2)$$

where  $\rho$  is the sample density.

Poisson ratio ( $\nu_p$ ) is calculated by

$$\nu_p = \frac{1 - 2(v_t/v_l)^2}{2 - 2(v_t/v_l)^2}. \quad (3)$$

Shear modulus ( $G$ ) is calculated by

$$G = \frac{E}{2(1 + \nu_p)}. \quad (4)$$

The Grüneisen parameter ( $\gamma$ ) is calculated by

$$\gamma = \frac{3}{2} \left( \frac{1 + \nu_p}{2 - 3\nu_p} \right). \quad (5)$$

Debye temperature ( $\theta_D$ ) is calculated by

$$\theta_D = \frac{h}{k_B} \left( \frac{3N}{4\pi V} \right)^{1/3} v_a, \quad (6)$$

where  $h$  is Planck's constant,  $k_B$  is the Boltzmann constant,  $N$  is the number of atoms in the primitive unit cell ( $N = 64$  for  $\text{Ag}_9\text{GaSe}_6$ ) and  $V$  is the unit cell volume.

Phonon mean free path ( $l$ ) is calculated by

$$\kappa_L = \frac{1}{3} C_V v_a l, \quad (7)$$

where  $C_V$  is the heat capacity at constant volume.

**Table S1** Sound velocities (longitudinal sound velocity  $v_l$ , transverse sound velocity  $v_t$ , average sound velocity  $v_a$ ) and lattice thermal conductivity  $\kappa_L$  of  $\text{Ag}_9\text{GaSe}_6$ . The elastic properties (Young's modulus  $E$ , Shear modulus  $G$ , Poisson ratio  $\nu_p$ ), the Grüneisen parameter  $\gamma$ , Debye temperature  $\theta_D$  and phonon mean free path  $l$  are

derived based on Eq. (1)-(7) based on the measured sound velocity.

| $T$ | $\kappa_L$                          | $\nu_t$             | $\nu_l$             | $\nu_a$             | $E$   | $G$   | $\nu_p$ | $\gamma$ | $\theta_D$ | $l$  |
|-----|-------------------------------------|---------------------|---------------------|---------------------|-------|-------|---------|----------|------------|------|
| (K) | (Wm <sup>-1</sup> K <sup>-1</sup> ) | (ms <sup>-1</sup> ) | (ms <sup>-1</sup> ) | (ms <sup>-1</sup> ) | (GPa) | (GPa) |         |          | (K)        | (nm) |
| 300 | 0.23                                | 2865                | 1130                | 1281                | 26.25 | 9.321 | 0.408   | 2.72     | 137.1      | 0.28 |

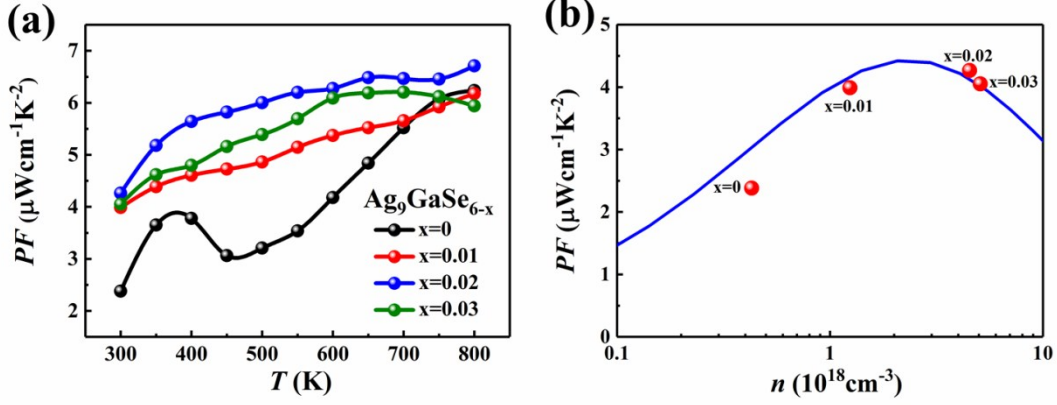

**Fig. S1** (a) Temperature dependence and (b) Hall carrier concentration ( $n$ ) dependence of  $PF$ s for  $Ag_9GaSe_{6-x}$ . The solid curve in Fig. S1b shows the calculated curve based on the single parabolic band (SPB) model with  $m^* = 0.11m_e$  dominated by acoustic phonon scattering.

## References

- 1 K. Kurosaki, A. Kosuga, H. Muta, M. Uno and S. Yamanaka, *Appl. Phys. Lett.*, 2005, **87**, 061919.
- 2 Y. L. Pei, J. Q. He, J. F. Li, F. Li, Q. J. Liu, W. Pan, C. Barreateau, D. Berardan, N. Dragoe and L. D. Zhao, *NPG Asia Mater.*, 2013, **5**, e47.
- 3 C. L. Wan, Z. X. Qu, Y. He, D. Luan and W. Pan, *Phys. Rev. Lett.*, 2008, **101**, 085901.
- 4 D. S. Sanditov and V. N. Belomestnykh, *Tech. Phys.*, 2011, **56**, 1619.
- 5 J. Y. Cho, X. Shi, J. R. Salvador, G. P. Meisner, J. Yang, H. Wang, A. A. Wereszczak, X. Zhou and C. Uher, *Phys. Rev. B*, 2011, **84**, 085207.
